# Supplementary material for: Assembly of the Novel Five-Component Apicomplexan Multi-Aminoacyl-tRNA Synthetase Complex Is Driven by the Hybrid Scaffold Protein Tg-p43
Source: PubMed Central journal article supplement (PMC3930741; doi:10.1371/journal.pone.0089487), 2014-02-20
Supplement: pone.0089487.s003.pdf [file pone.0089487.s003.pdf]

**Supporting Table 1:** Primers and vectors used for genetic manipulation of *T. gondii* and for heterologous recombinant expression of *T. gondii* proteins.

| Vector                                             | Amplified region                                                  | Primer name          | Primer sequence                                                                          | Amplified fragment size |
|----------------------------------------------------|-------------------------------------------------------------------|----------------------|------------------------------------------------------------------------------------------|-------------------------|
| pLIC vectors<br>- expressed<br>in <i>T. gondii</i> | <i>Tgp43</i>                                                      | LIC066670-F          | tactccaatccaatttagcccgcgac<br>gattcgcgccaggacaccctgtg                                    | 2299 bp                 |
|                                                    |                                                                   | LIC066670-R          | tctccacttccaatttagcagaga<br>tggtgcctccgacgatagagtac                                      |                         |
|                                                    |                                                                   | LICp43delta-F        | tactccaatccaatttagctcctttt<br>agttaaaccgacgacgcttc                                       | 1687 bp                 |
|                                                    |                                                                   | LICp43delta-R        | tctccacttccaatttagctccacc<br>ttcgacgaaccgggtgtgctctg                                     |                         |
|                                                    | <i>TgYRS</i>                                                      | LIC103260-F          | tactccaatccaatttagccgcgag<br>gcatggacatgcaaacgtccgc                                      | 2121 bp                 |
|                                                    |                                                                   | LIC103260-R          | tctccacttccaatttagcttctgc<br>acttgatgctttaattgctg                                        |                         |
|                                                    | <i>TgMRS</i>                                                      | LIC289300-F          | tactccaatccaatttagcgactg<br>cgattcgacgaagacgcctgac                                       | 1157 bp                 |
|                                                    |                                                                   | LIC289300-R          | tctccacttccaatttagcaagcg<br>cgagagaaaggcgccctggcag                                       |                         |
|                                                    | Upstream<br>flanking<br>region of<br><i>Tgp43</i>                 | attB1-066670         | ggggacaagtgtgtacaaaaag<br>caggctctgaagcagctcagccg<br>cagggttgcac                         | 1609 bp                 |
|                                                    |                                                                   | attB4-066670         | ggggacaacttgtatagaaaagt<br>gggtggcgcaagacaaagatgc<br>atgctgcg                            |                         |
|                                                    | Downstream<br>flanking<br>region of<br><i>Tgp43</i>               | attB2-066670         | ggggaccacttgtacaagaaag<br>ctgggtacctcgatgtcacaatgat<br>aatgtgg                           | 1719 bp                 |
|                                                    |                                                                   | attB3-066670         | ggggacaacttgtataataaagt<br>gcaatggactaacgtgtgctcca<br>gc                                 |                         |
| pETDuet-1 -<br>expressed in<br><i>E. coli</i>      | <i>Tgp43</i><br>( <i>TgVEG_053</i><br>640<br>residues<br>208-679) | TgP43-Fwd-NcoI       | catgccatggaactgattatgatag<br>cacaccgg                                                    | n/a                     |
|                                                    |                                                                   | TgP43-Rev- His-BamHI | cgcgatccttaatgatgatgatgat<br>gatgagcaccagcaccgctgatg<br>gtgccaccaacaatgctatcgcaa<br>aaac | n/a                     |
| pcDNA4 -<br>expressed in<br>HEK293                 | <i>Tgp43</i><br>( <i>TgVEG_053</i><br>640 residues<br>208-679)    | p43-pcDNA4-Cter-Fwd  | tggtggtgctggtgccatgaact<br>gattatgatagcacaccggcagc                                       | n/a                     |
|                                                    |                                                                   | p43-pcDNA4-Cter-Rev  | gctccggtcctgccccagcgtg<br>atggtgccaccaacaatgctatcgc                                      | n/a                     |
|                                                    |                                                                   | p43-pcDNA4-Rev       | gctccggtcctgccccagcttagc<br>tgatggtgccaccaacaatgctatc<br>gc                              | n/a                     |
